# Supplementary material for: A local measure of symmetry and orientation for individual spikes of grid cells
Source: PubMed Central journal article supplement (PMC6382163; doi:10.1371/journal.pcbi.1006804), 2019-02-07

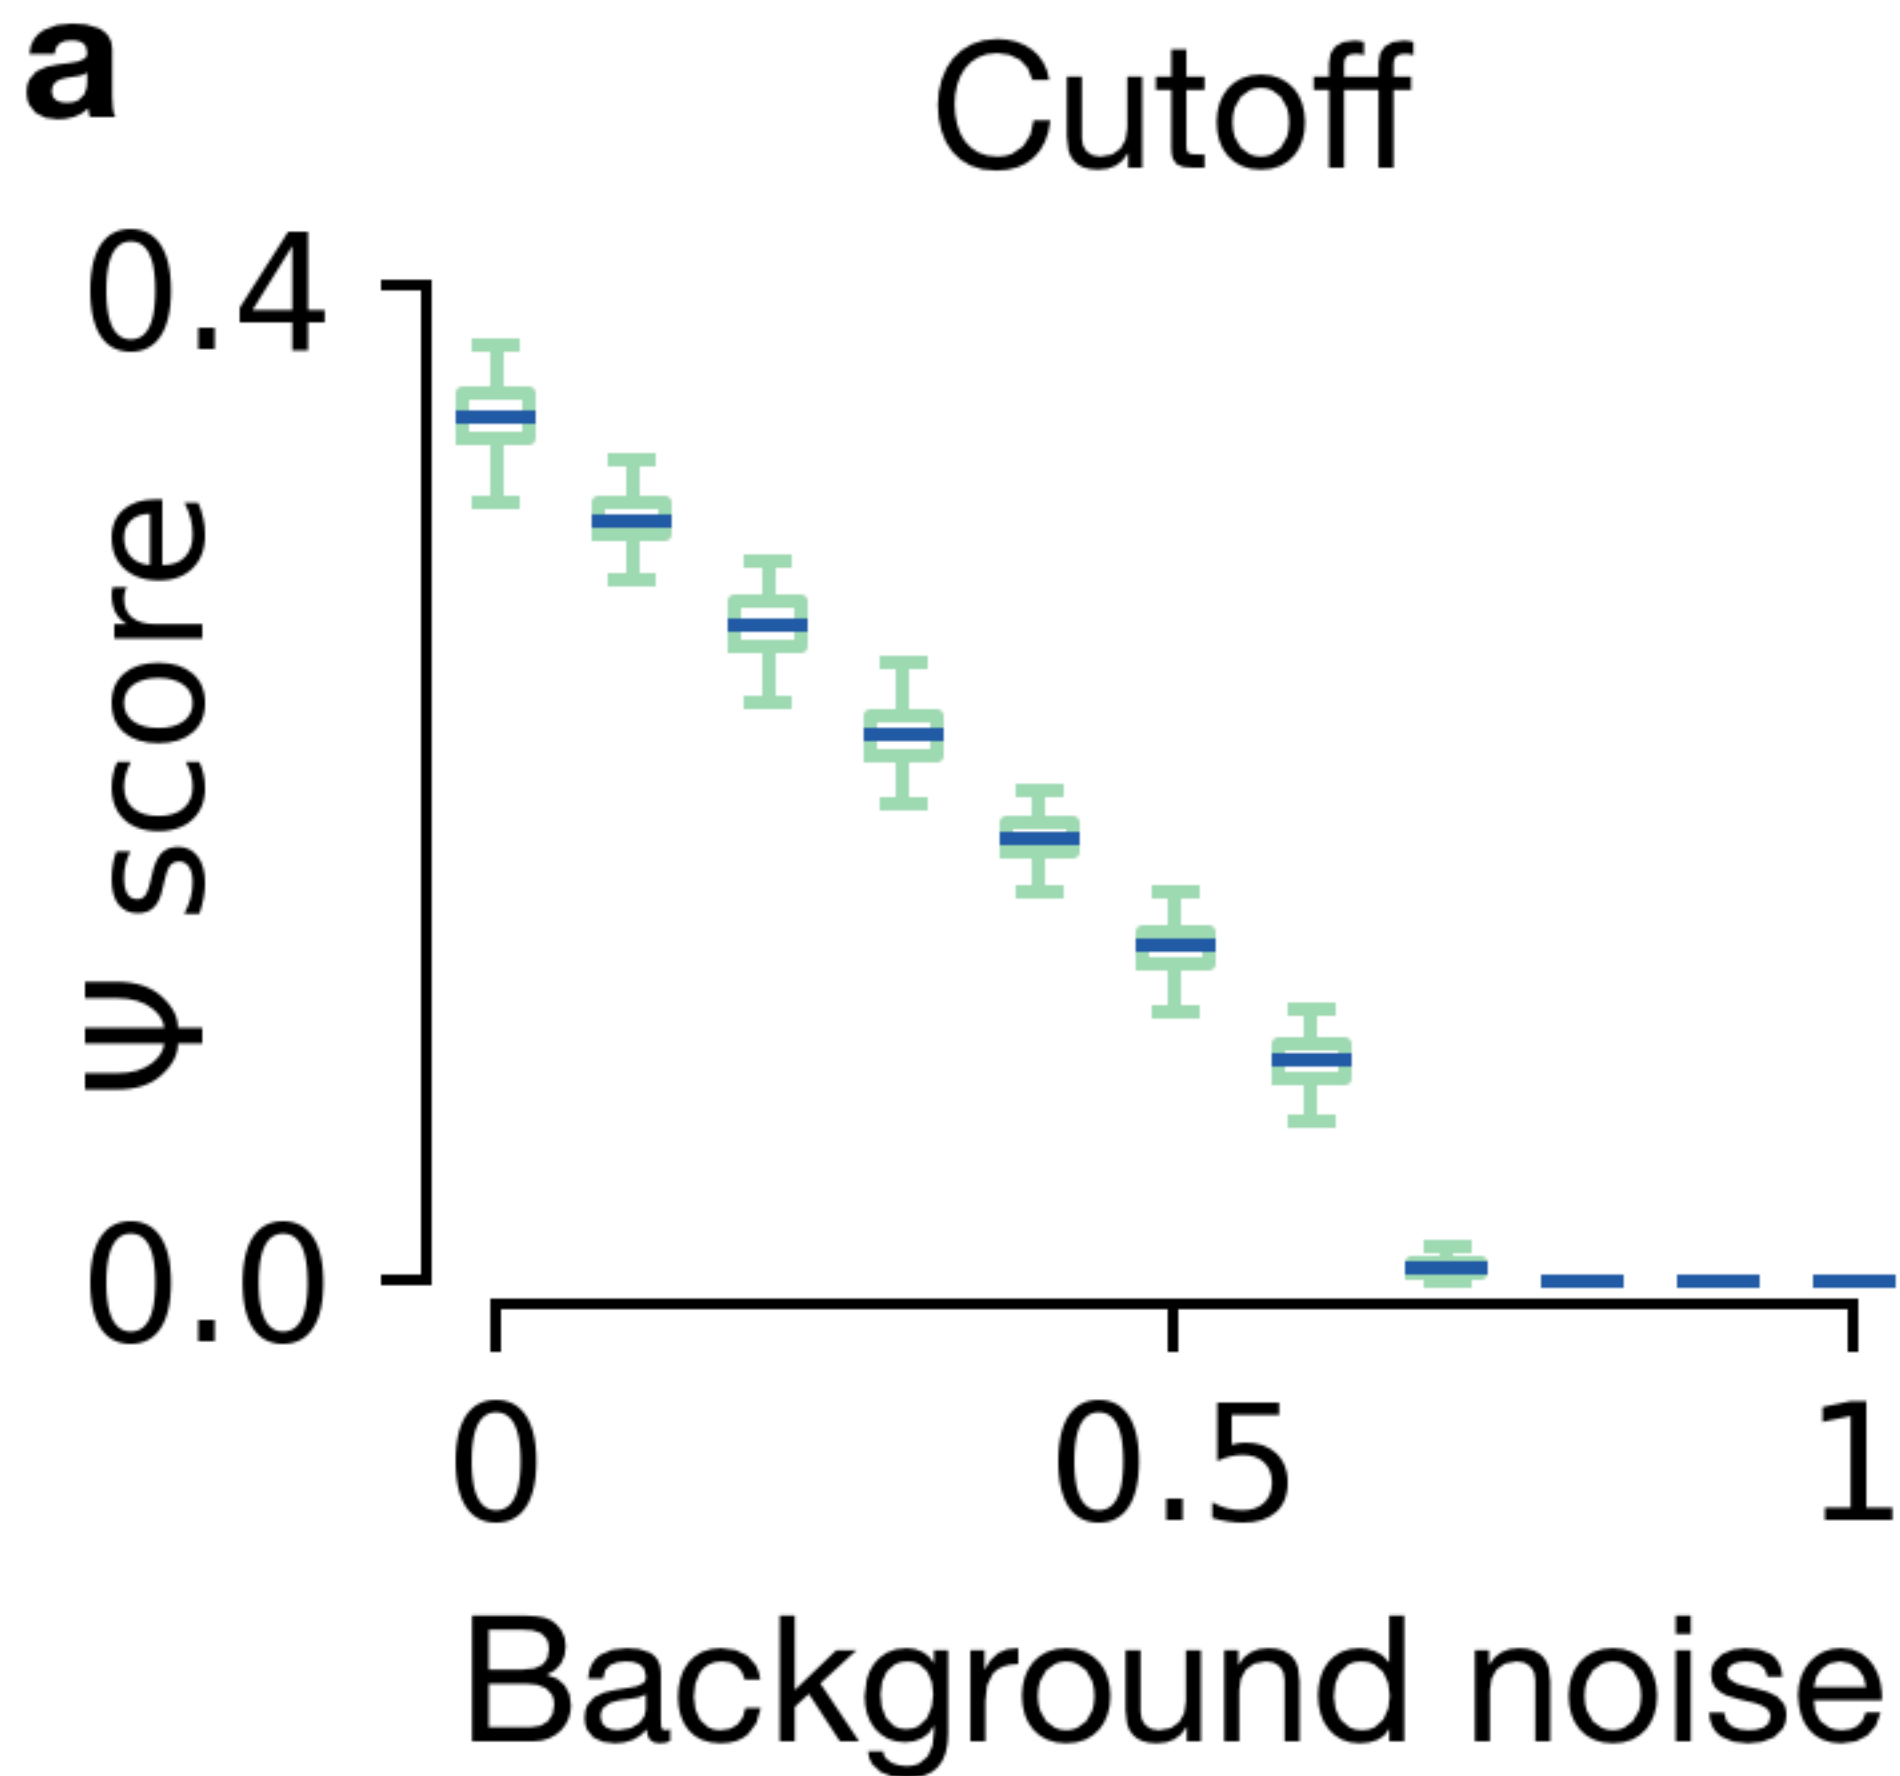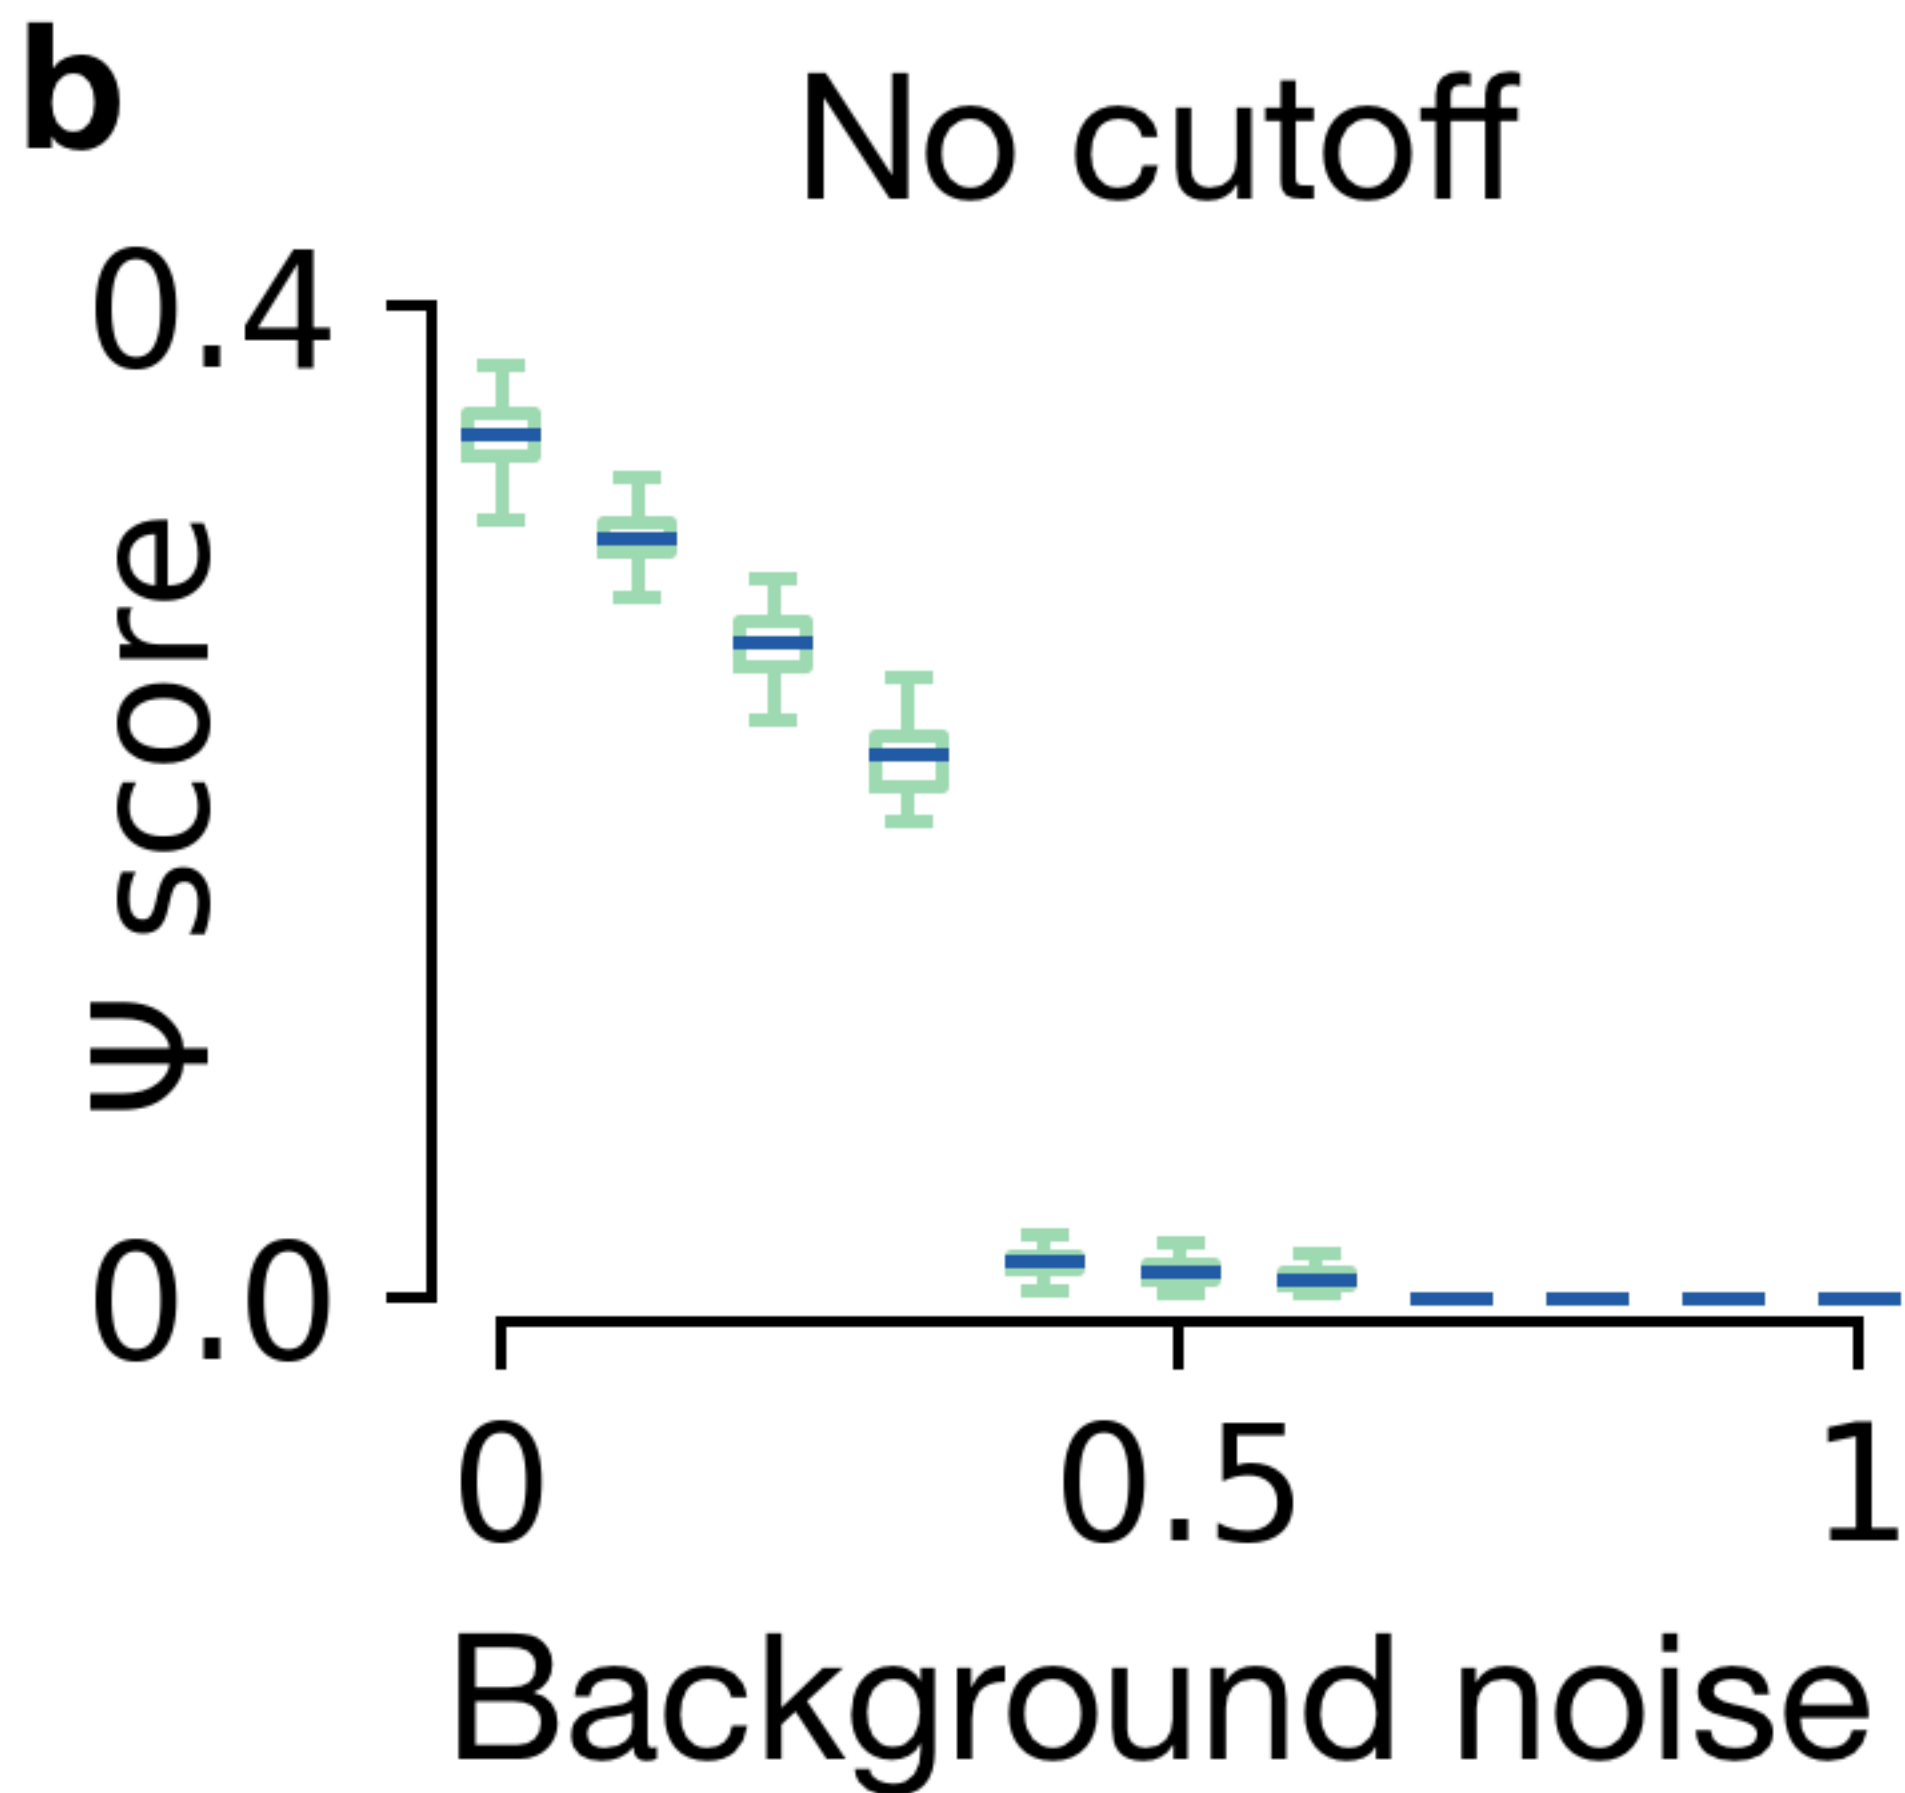

Supplement: pcbi.1006804.s002.pdf [file pcbi.1006804.s002.pdf]
